# Supplementary material
Source: Springer Nature journal article supplement (https://www.springermedizin.de/resource/supplementary/12913_2013_2788_MOESM2_ESM.pdf/9531456)

## Remoteness Classes

- Inner Regional Australia
- Major Cities of Australia
- Outer Regional Australia
- Remote Australia
- Very Remote Australia

- States and Territories
- GP Division Boundaries
- SLA Boundaries

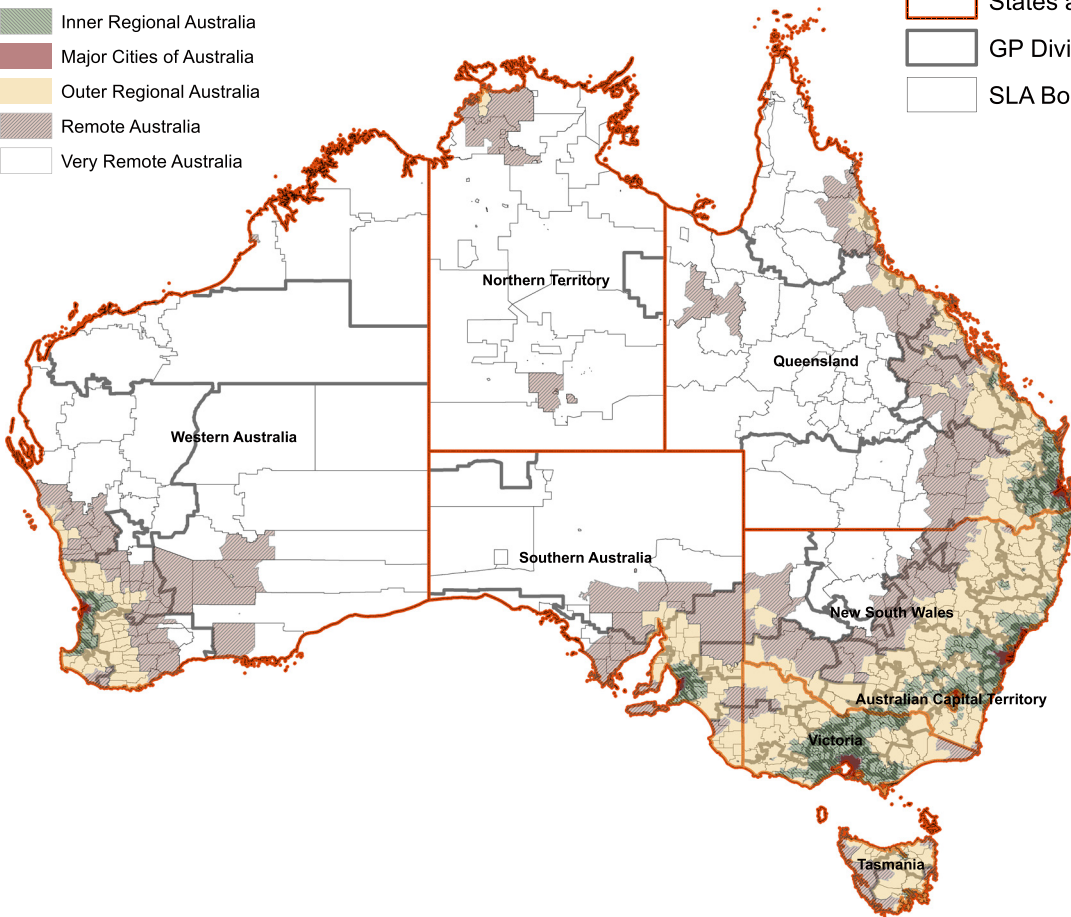

Supplement: MOESM2 [file 9531456]
